# Supplementary material for: Penicillin and Oxacillin Loaded on PEGylated-Graphene Oxide to Enhance the Activity of the Antibiotics against Methicillin-Resistant Staphylococcus aureus
Source: MDPI journal article supplement (doi:10.3390/pharmaceutics14102049), 2022-09-26
Supplement: s1 [file s1]

# Supplementary Materials: Penicillin and Oxacillin Loaded on PEGylated-Graphene Oxide to Enhance the Activity of the Antibiotics against Methicillin-Resistant *Staphylococcus aureus*

Mohadeseh Mohammadi Tabar, Moj Khaleghi, Elham Bidram, Atefeh Zarepour and Ali Zarrabi

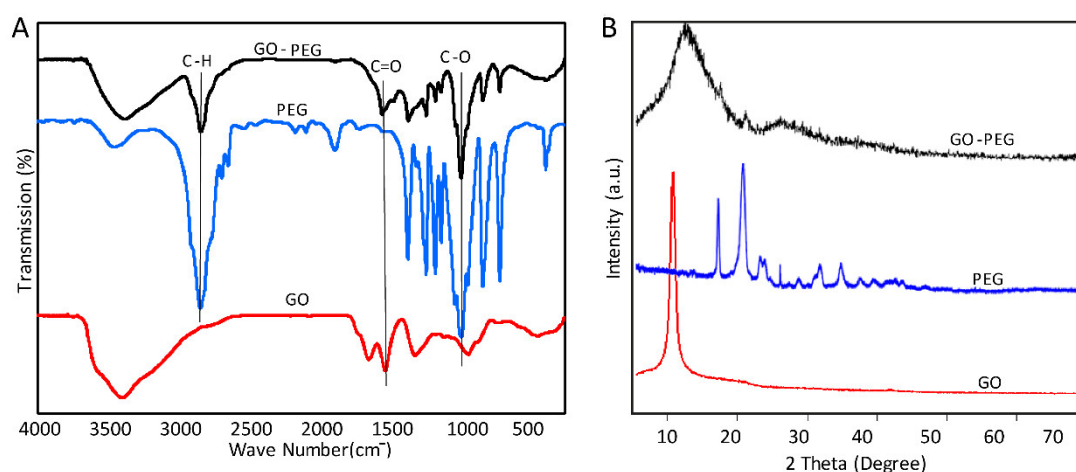

**Figure S1.** A) FT-IR spectra of GO, PEG, and GO-PEG; B) XRD patterns of GO, PEG, and GO-PEG.

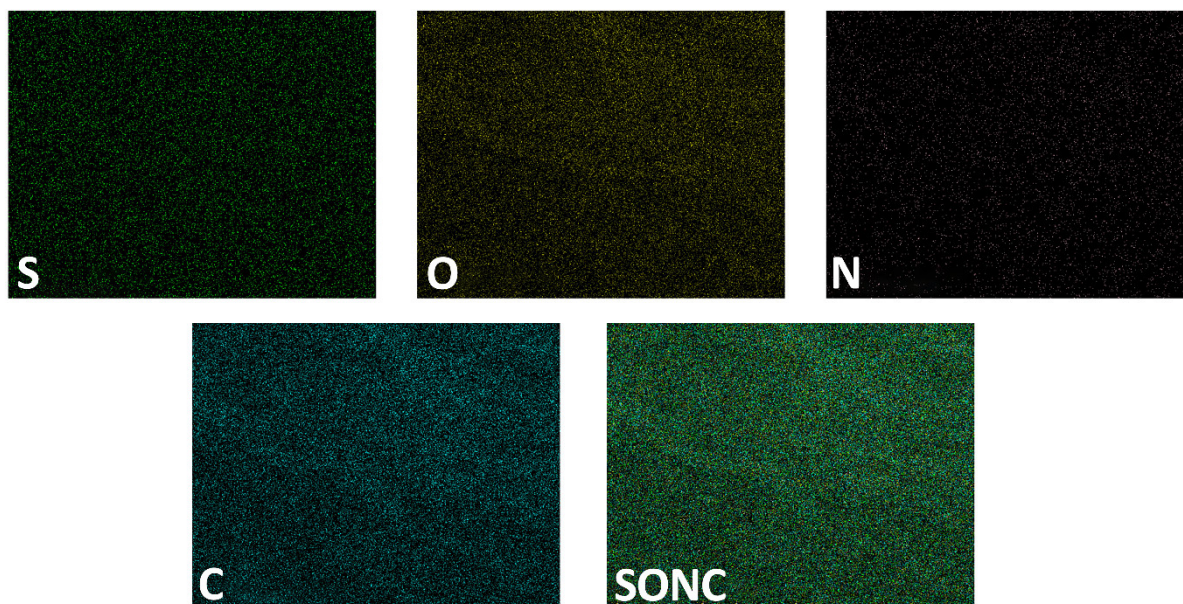

**Figure S2.** EDX mapping of elements (S, O, N, and C) on the GO-PEG- OXA surface.

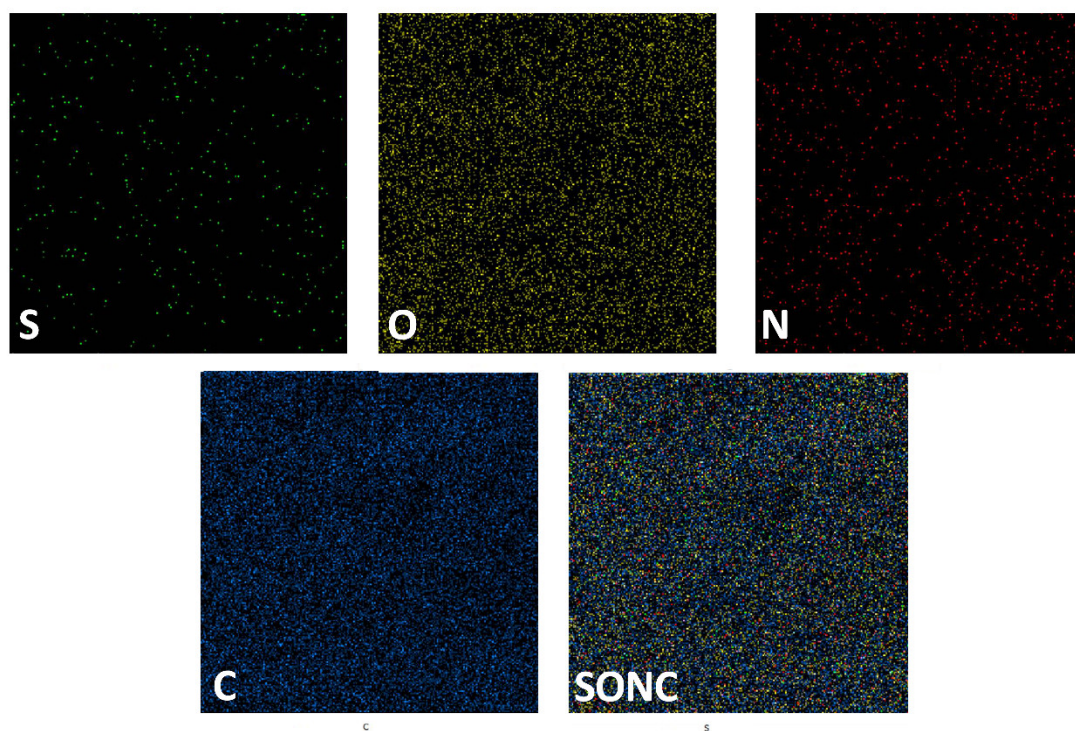

**Figure S3.** EDX mapping of elements (S, O, N, and C) on the GO-PEG- PEN surface.
